# Supplementary material for: Implementing and monitoring the right to health in breast cancer: selection of indicators using a Delphi process
Source: Springer Nature journal article supplement (doi:10.1186/s12939-023-01964-w), 2023-07-29
Supplement: MOESM3 [file 25863154]

**Appendix 3: list of indicators with their score at the end of the study**

| Building blocks and indicators                                                                                                                       | ROUND1 |             |        | ROUND 2             |             |        | Selected? |
|------------------------------------------------------------------------------------------------------------------------------------------------------|--------|-------------|--------|---------------------|-------------|--------|-----------|
|                                                                                                                                                      | Reject | Indifferent | Select | Reject              | Indifferent | Select |           |
| <b>1. Health service delivery</b>                                                                                                                    |        |             |        |                     |             |        |           |
| Structural                                                                                                                                           |        |             |        |                     |             |        |           |
| <b>Indicator #1 (novel)</b>                                                                                                                          |        |             |        |                     |             |        |           |
| In the National Cancer Plan (NCP) or Non-Communicable Diseases Plan (NCDP) there is a strategy to implement population-based breast cancer screening | 18%    | 9%          | 73%    | 0%                  | 13%         | 88%    | yes       |
| <b>Indicator #2 (novel)</b>                                                                                                                          |        |             |        |                     |             |        |           |
| In the NCP or NCDP there a strategy to implement early detection of breast cancer in women at higher risk due to their family history                | 27%    | 0%          | 73%    | 13%                 | 13%         | 75%    | no        |
| <b>Indicator #3 (novel)</b>                                                                                                                          |        |             |        |                     |             |        |           |
| In the NCP or NCDP there is a strategy to implement an early diagnosis programme in line with <u>local guidelines</u>                                | 27%    | 9%          | 64%    | 11%                 | 22%         | 67%    | no        |
| <b>Indicator #4 (novel)</b>                                                                                                                          |        |             |        |                     |             |        |           |
| In the NCP or NCDP there is a strategy to implement breast cancer national treatment guidelines in line with <u>local guidelines</u>                 | 27%    | 9%          | 64%    | 11%                 | 22%         | 67%    | no        |
| <b>Indicator #5 (novel)</b>                                                                                                                          |        |             |        |                     |             |        |           |
| In the NCP or NCDP there is a strategy to implement access to breast reconstruction                                                                  | 36%    | 0%          | 64%    | 56%                 | 0%          | 44%    | no        |
| <b>Indicator #6 (novel)</b>                                                                                                                          |        |             |        |                     |             |        |           |
| In the NCP or NCDP there is a strategy to implement access to radiotherapy                                                                           | 9%     | 0%          | 91%    | Selected in round 1 |             |        | yes       |
| <b>Indicator #7 (novel)</b>                                                                                                                          |        |             |        |                     |             |        |           |
| In the NCP or NCDP there is a strategy to implement a multidisciplinary care for breast cancer                                                       | 36%    | 0%          | 64%    | 33%                 | 0%          | 67%    | no        |

| Building blocks and indicators                                                                                                                                                            | ROUND1 |             |        | ROUND 2             |             |        | Selected? |
|-------------------------------------------------------------------------------------------------------------------------------------------------------------------------------------------|--------|-------------|--------|---------------------|-------------|--------|-----------|
|                                                                                                                                                                                           | Reject | Indifferent | Select | Reject              | Indifferent | Select |           |
| <b>Indicator #8 (novel)</b><br>In the NCP or NCDP there is a strategy to implement palliative/supportive care                                                                             | 9%     | 0%          | 91%    | Selected in round 1 |             |        | yes       |
| <b>Indicator #9 (novel)</b><br>In the NCP or NCDP there is a strategy to implement survivorship care                                                                                      | 27%    | 0%          | 73%    | 0%                  | 0%          | 100%   | yes       |
| <b>Indicator #10 (novel)</b><br>In the NCP or NCDP there is a strategy to implement end-of-life care                                                                                      | 9%     | 0%          | 91%    | Selected in round 1 |             |        | yes       |
| <b>Indicator #11 (novel)</b><br>In the NCP or NCDP there is a strategy to implement travel subsidies to access cancer services <i>for those in need</i>                                   | 36%    | 0%          | 64%    | 44%                 | 11%         | 44%    | no        |
| <b>Indicator #12 (novel)</b><br>In the NCP or NCDP there is a strategy to implement fertility-preservation techniques in younger premenopausal patients                                   | 36%    | 18%         | 45%    | 33%                 | 22%         | 44%    | no        |
| Process                                                                                                                                                                                   |        |             |        |                     |             |        |           |
| <b>Indicator #13 (novel)</b><br>There is a population-based breast cancer screening programme in place                                                                                    | 18%    | 9%          | 73%    | 13%                 | 13%         | 75%    | no        |
| <b>Indicator #14 (novel)</b><br>The screening programmes involves annual or biennial mammography in women aged 50-69                                                                      | 55%    | 18%         | 27%    | 63%                 | 25%         | 13%    | no        |
| <b>Indicator #15 (novel)</b><br>The screening programme includes annual MRI and annual mammography, concomitant or alternating, for women with a strong familial history of breast cancer | 45%    | 0%          | 55%    | 44%                 | 0%          | 56%    | no        |
| <b>Indicator #16 (novel)</b>                                                                                                                                                              |        |             |        |                     |             |        |           |

| Building blocks and indicators                                                                                                                             | ROUND1 |             |        | ROUND 2             |             |        | Selected? |
|------------------------------------------------------------------------------------------------------------------------------------------------------------|--------|-------------|--------|---------------------|-------------|--------|-----------|
|                                                                                                                                                            | Reject | Indifferent | Select | Reject              | Indifferent | Select |           |
| The screening programme includes mobile units in hard-to-reach communities                                                                                 | 40%    | 0%          | 60%    | 44%                 | 0%          | 56%    | no        |
| <b>Indicator #17 (novel)</b>                                                                                                                               |        |             |        |                     |             |        |           |
| There is genetic testing in place for women with strong familial history of breast cancer                                                                  | 36%    | 0%          | 64%    | 25%                 | 25%         | 50%    | no        |
| <b>Indicator #18 (novel)</b>                                                                                                                               |        |             |        |                     |             |        |           |
| There is a referral system in place for women with strong familial history of breast cancer to have a mammogram or MRI                                     | 27%    | 0%          | 73%    | 25%                 | 0%          | 75%    | no        |
| <b>Indicator #19 (novel)</b>                                                                                                                               |        |             |        |                     |             |        |           |
| There is a referral system in place from primary care to oncology services                                                                                 | 9%     | 0%          | 91%    | Selected in round 1 |             |        | yes       |
| <b>Indicator #20 (novel)</b>                                                                                                                               |        |             |        |                     |             |        |           |
| There is a specified maximum waiting time between diagnostic suspicion in primary care and the first appointment with an oncologist                        | 9%     | 9%          | 82%    | Selected in round 1 |             |        | yes       |
| <b>Indicator #21 (novel)</b>                                                                                                                               |        |             |        |                     |             |        |           |
| There is a specified maximum waiting time between the confirmed diagnostic and the first appointment for treatment                                         | 9%     | 9%          | 82%    | Selected in round 1 |             |        | yes       |
| <b>Indicator #22 (novel)</b>                                                                                                                               |        |             |        |                     |             |        |           |
| The national diagnosis guidelines involve pathological evaluation in line with ESMO or ASCO recommendations                                                | 27%    | 0%          | 73%    | 0%                  | 13%         | 88%    | yes       |
| <b>Indicator #23 (novel)</b>                                                                                                                               |        |             |        |                     |             |        |           |
| The national diagnosis guidelines involve genetic counselling and testing for germline BRCA1 and BRCA2 mutations in high-risk group breast cancer patients | 27%    | 9%          | 64%    | 13%                 | 13%         | 75%    | no        |

| Building blocks and indicators                                                                                                               | ROUND1 |             |        | ROUND 2 |             |        | Selected? |
|----------------------------------------------------------------------------------------------------------------------------------------------|--------|-------------|--------|---------|-------------|--------|-----------|
|                                                                                                                                              | Reject | Indifferent | Select | Reject  | Indifferent | Select |           |
| <b>Indicator #24 (novel)</b>                                                                                                                 |        |             |        |         |             |        |           |
| The national treatment guidelines offer breast reconstruction to all women requiring mastectomy                                              | 36%    | 0%          | 64%    | 11%     | 33%         | 56%    | no        |
| <b>Indicator #25 (existing)</b>                                                                                                              |        |             |        |         |             |        |           |
| The number of mammography units, per 1,000,000 inhabitants                                                                                   | 27%    | 18%         | 55%    | 22%     | 22%         | 56%    | no        |
| <b>Indicator #25 disaggregated (novel)</b>                                                                                                   |        |             |        |         |             |        |           |
| Disaggregated by geography                                                                                                                   | 36%    | 0%          | 64%    | 33%     | 0%          | 67%    | no        |
| <b>Indicator #26 (existing)</b>                                                                                                              |        |             |        |         |             |        |           |
| The number of ultrasound machines, per 1,000 inhabitants                                                                                     | 27%    | 9%          | 64%    | 25%     | 0%          | 75%    | no        |
| <b>Indicator #26 disaggregated (novel)</b>                                                                                                   |        |             |        |         |             |        |           |
| Disaggregated by geography                                                                                                                   | 36%    | 0%          | 64%    | 25%     | 0%          | 75%    | no        |
| <b>Indicator #27 (existing)</b>                                                                                                              |        |             |        |         |             |        |           |
| The number of radiotherapy units is at least as high as the optimal threshold set by the IAEA (one radiotherapy unit per 500,000 population) | 18%    | 9%          | 73%    | 13%     | 0%          | 88%    | yes       |
| <b>Indicator #27 disaggregated (novel)</b>                                                                                                   |        |             |        |         |             |        |           |
| Disaggregated by geography                                                                                                                   | 27%    | 0%          | 73%    | 13%     | 0%          | 88%    | yes       |
| <b>Indicator #28 (novel)</b>                                                                                                                 |        |             |        |         |             |        |           |

| Building blocks and indicators                                                                                                                                                                                                                      | ROUND1 |             |        | ROUND 2             |             |        | Selected? |
|-----------------------------------------------------------------------------------------------------------------------------------------------------------------------------------------------------------------------------------------------------|--------|-------------|--------|---------------------|-------------|--------|-----------|
|                                                                                                                                                                                                                                                     | Reject | Indifferent | Select | Reject              | Indifferent | Select |           |
| Number of disciplines forming part of the breast cancer care unit in a given hospital                                                                                                                                                               | 36%    | 18%         | 45%    | 78%                 | 0%          | 22%    | no        |
| <b>Indicator #28 disaggregated (novel)</b>                                                                                                                                                                                                          |        |             |        |                     |             |        |           |
| Disaggregated by geography                                                                                                                                                                                                                          | 40%    | 10%         | 50%    | 71%                 | 0%          | 29%    | no        |
| <b>Indicator #29 (novel)</b>                                                                                                                                                                                                                        |        |             |        |                     |             |        |           |
| Number of specialists the breast cancer unit collaborates with, out of a psychologist, a social worker, a dietitian, an exercise physiologist, a genetic counsellor, an occupational therapist, a physiotherapist, and a specialist palliative care | 40%    | 10%         | 50%    | 67%                 | 11%         | 22%    | no        |
| <b>Indicator #29 disaggregated (novel)</b>                                                                                                                                                                                                          |        |             |        |                     |             |        |           |
| Disaggregated by geography                                                                                                                                                                                                                          | 50%    | 0%          | 50%    | 63%                 | 13%         | 25%    | no        |
| <b>Indicator #30 (novel)</b>                                                                                                                                                                                                                        |        |             |        |                     |             |        |           |
| The breast unit <i>includes</i> ASCO recommended integrative therapies to reduce stress, anxiety and depression: music therapy, meditation, stress management, yoga, relaxation, and massage                                                        | 55%    | 0%          | 45%    | 67%                 | 0%          | 33%    | no        |
| <b>Indicator #30 disaggregated (novel)</b>                                                                                                                                                                                                          |        |             |        |                     |             |        |           |
| Disaggregated by geography                                                                                                                                                                                                                          | 45%    | 0%          | 55%    | 63%                 | 0%          | 38%    | no        |
| <b>Indicator #31 (novel)</b>                                                                                                                                                                                                                        |        |             |        |                     |             |        |           |
| The breast unit <i>includes</i> ASCO recommended integrative therapies to reduce chemotherapy-induced nausea and vomiting: acupuncture and acupressure                                                                                              | 45%    | 9%          | 45%    | 44%                 | 11%         | 44%    | no        |
| <b>Indicator #31 disaggregated (novel)</b>                                                                                                                                                                                                          |        |             |        |                     |             |        |           |
| Disaggregated by geography                                                                                                                                                                                                                          | 55%    | 0%          | 45%    | 50%                 | 0%          | 50%    | no        |
| <b>Indicator #32 (novel)</b>                                                                                                                                                                                                                        |        |             |        |                     |             |        |           |
| There is a referral system in place from the breast unit to psychological care                                                                                                                                                                      | 9%     | 0%          | 91%    | Selected in round 1 |             |        | yes       |

| Building blocks and indicators                                                                                             | ROUND1 |             |        | ROUND 2             |             |        | Selected? |
|----------------------------------------------------------------------------------------------------------------------------|--------|-------------|--------|---------------------|-------------|--------|-----------|
|                                                                                                                            | Reject | Indifferent | Select | Reject              | Indifferent | Select |           |
| <b>Indicator #32 disaggregated (novel)</b>                                                                                 |        |             |        |                     |             |        |           |
| Disaggregated by geography                                                                                                 | 9%     | 0%          | 91%    | Selected in round 1 |             |        | yes       |
| <b>Indicator #33 (novel)</b>                                                                                               |        |             |        |                     |             |        |           |
| There is a referral system in place from the breast unit to reconstructive surgery                                         | 36%    | 0%          | 64%    | 13%                 | 13%         | 75%    | no        |
| <b>Indicator #33 disaggregated (novel)</b>                                                                                 |        |             |        |                     |             |        |           |
| Disaggregated by geography                                                                                                 | 36%    | 0%          | 64%    | 13%                 | 13%         | 75%    | no        |
| <b>Indicator #34 (novel)</b>                                                                                               |        |             |        |                     |             |        |           |
| There is a trained member of staff acting as patient navigator in the breast unit                                          | 9%     | 9%          | 82%    | Selected in round 1 |             |        | yes       |
| <b>Indicator #34 disaggregated (novel)</b>                                                                                 |        |             |        |                     |             |        |           |
| Disaggregated by geography                                                                                                 | 18%    | 0%          | 82%    | Selected in round 1 |             |        | yes       |
| Outcome                                                                                                                    |        |             |        |                     |             |        |           |
| <b>Indicator #35 (novel)</b>                                                                                               |        |             |        |                     |             |        |           |
| Proportion of suspected breast cancer patients with a first consultant appointment within 2 weeks of primary care referral | 9%     | 9%          | 82%    | Selected in round 1 |             |        | yes       |
| <b>Indicator #35 disaggregated (novel)</b>                                                                                 |        |             |        |                     |             |        |           |
| Disaggregated by wealth quintile and ethnicity                                                                             | 18%    | 9%          | 73%    | 22%                 | 11%         | 67%    | no        |
| <b>Indicator #36 (novel)</b>                                                                                               |        |             |        |                     |             |        |           |
| Proportion of breast cancer patients with a surgery appointment within 1 month of a decision to treat with surgery         | 18%    | 9%          | 73%    | 0%                  | 25%         | 75%    | no        |
| <b>Indicator #36 disaggregated (novel)</b>                                                                                 |        |             |        |                     |             |        |           |

| Building blocks and indicators                                                                                                   | ROUND1 |             |        | ROUND 2 |             |        | Selected? |
|----------------------------------------------------------------------------------------------------------------------------------|--------|-------------|--------|---------|-------------|--------|-----------|
|                                                                                                                                  | Reject | Indifferent | Select | Reject  | Indifferent | Select |           |
| Disaggregated by wealth quintile and ethnicity                                                                                   | 27%    | 9%          | 64%    | 13%     | 25%         | 63%    | no        |
| <b>Indicator #37 (novel)</b>                                                                                                     |        |             |        |         |             |        |           |
| Proportion of breast cancer patients who started adjuvant systemic therapy within 6 weeks after surgery                          | 27%    | 9%          | 64%    | 13%     | 13%         | 75%    | no        |
| <b>Indicator #37 disaggregated (novel)</b>                                                                                       |        |             |        |         |             |        |           |
| Disaggregated by wealth quintile and ethnicity                                                                                   | 27%    | 9%          | 64%    | 13%     | 13%         | 75%    | no        |
| <b>Indicator #38 (novel)</b>                                                                                                     |        |             |        |         |             |        |           |
| Proportion of breast cancer patients who started neoadjuvant systemic therapy within 4 weeks after diagnosis                     | 27%    | 9%          | 64%    | 13%     | 13%         | 75%    | no        |
| <b>Indicator #38 disaggregated (novel)</b>                                                                                       |        |             |        |         |             |        |           |
| Disaggregated by wealth quintile and ethnicity                                                                                   | 27%    | 9%          | 64%    | 13%     | 13%         | 75%    | no        |
| <b>Indicator #39 (existing)</b>                                                                                                  |        |             |        |         |             |        |           |
| Probability of visiting a doctor, adjusted for need                                                                              | 40%    | 10%         | 50%    | 44%     | 22%         | 33%    | no        |
| <b>Indicator #40 (existing)</b>                                                                                                  |        |             |        |         |             |        |           |
| Proportion of women aged 50-69 who have had a screening mammogram within the last 2 or 3 years                                   | 36%    | 18%         | 45%    | 33%     | 11%         | 56%    | no        |
| <b>Indicator #40 disaggregated (novel)</b>                                                                                       |        |             |        |         |             |        |           |
| Disaggregated by wealth quintile and ethnicity                                                                                   | 36%    | 18%         | 45%    | 25%     | 13%         | 63%    | no        |
| <b>Indicator #41 (novel)</b>                                                                                                     |        |             |        |         |             |        |           |
| Proportion of women with strong familial history of breast cancer who have had a mammography or MRI in the last <u>24 months</u> | 36%    | 9%          | 55%    | 33%     | 0%          | 67%    | no        |
| <b>Indicator #41 disaggregated (novel)</b>                                                                                       |        |             |        |         |             |        |           |

| Building blocks and indicators                                                                   | ROUND1 |             |        | ROUND 2             |             |        | Selected? |
|--------------------------------------------------------------------------------------------------|--------|-------------|--------|---------------------|-------------|--------|-----------|
|                                                                                                  | Reject | Indifferent | Select | Reject              | Indifferent | Select |           |
| Disaggregated by wealth quintile and ethnicity                                                   | 45%    | 9%          | 45%    | 25%                 | 13%         | 63%    | no        |
| <b>Indicator #42 (novel)</b>                                                                     |        |             |        |                     |             |        |           |
| Proportion of women with <i>advanced stage (IIB-IV)</i> at diagnosis                             | 27%    | 9%          | 64%    | 22%                 | 0%          | 78%    | no        |
| <b>Indicator #42 disaggregated (novel)</b>                                                       |        |             |        |                     |             |        |           |
| Disaggregated by wealth quintile and ethnicity                                                   | 27%    | 9%          | 64%    | 13%                 | 0%          | 88%    | yes       |
| <b>Indicator #43 (novel)</b>                                                                     |        |             |        |                     |             |        |           |
| Proportion of women with advanced breast cancer (stage IV) at diagnosis                          | 18%    | 9%          | 73%    | 0%                  | 0%          | 100%   | yes       |
| <b>Indicator #43 disaggregated (novel)</b>                                                       |        |             |        |                     |             |        |           |
| Disaggregated by wealth quintile and ethnicity                                                   | 10%    | 10%         | 80%    | 0%                  | 0%          | 100%   | yes       |
| <b>Indicator #44 (novel)</b>                                                                     |        |             |        |                     |             |        |           |
| Proportion of breast cancer patients forgoing or postponing care because of limited availability | 9%     | 9%          | 82%    | Selected in round 1 |             |        | yes       |
| <b>Indicator #44 disaggregated (novel)</b>                                                       |        |             |        |                     |             |        |           |
| Disaggregated by wealth quintile and ethnicity                                                   | 9%     | 9%          | 82%    | Selected in round 1 |             |        | yes       |
| <b>Indicator #45 (novel)</b>                                                                     |        |             |        |                     |             |        |           |
| Proportion of breast cancer patients forgoing care because of affordability                      | 9%     | 9%          | 82%    | Selected in round 1 |             |        | yes       |
| <b>Indicator #45 disaggregated (novel)</b>                                                       |        |             |        |                     |             |        |           |
| Disaggregated by wealth quintile and ethnicity                                                   | 9%     | 9%          | 82%    | Selected in round 1 |             |        | yes       |
| <b>Indicator #46 (novel)</b>                                                                     |        |             |        |                     |             |        |           |
| Proportion of women adhering to their treatment                                                  | 36%    | 9%          | 55%    | 67%                 | 0%          | 33%    | no        |
| <b>Indicator #46 disaggregated (novel)</b>                                                       |        |             |        |                     |             |        |           |



| Building blocks and indicators                                                                                                                        | ROUND1 |             |        | ROUND 2             |             |        | Selected? |
|-------------------------------------------------------------------------------------------------------------------------------------------------------|--------|-------------|--------|---------------------|-------------|--------|-----------|
|                                                                                                                                                       | Reject | Indifferent | Select | Reject              | Indifferent | Select |           |
| Disaggregated by wealth quintile and ethnicity                                                                                                        | 36%    | 9%          | 55%    | 75%                 | 0%          | 25%    | no        |
| <b>Indicator #47 (novel)</b>                                                                                                                          |        |             |        |                     |             |        |           |
| Proportion of breast cancer patients in high-risk groups who have been offered genetic counselling and testing for germline BRCA1 and BRCA2 mutations | 36%    | 9%          | 55%    | 50%                 | 0%          | 50%    | no        |
| <b>Indicator #47 disaggregated (novel)</b>                                                                                                            |        |             |        |                     |             |        |           |
| Disaggregated by wealth quintile and ethnicity                                                                                                        | 36%    | 9%          | 55%    | 50%                 | 0%          | 50%    | no        |
| <b>Indicator #48 (novel)</b>                                                                                                                          |        |             |        |                     |             |        |           |
| Proportion of breast cancer patients who receive <i>palliative care</i>                                                                               | 10%    | 0%          | 90%    | Selected in round 1 |             |        | yes       |
| <b>Indicator #48 disaggregated (novel)</b>                                                                                                            |        |             |        |                     |             |        |           |
| Disaggregated by wealth quintile and ethnicity                                                                                                        | 9%     | 9%          | 82%    | Selected in round 1 |             |        | yes       |
| <b>Indicator #49 (novel)</b>                                                                                                                          |        |             |        |                     |             |        |           |
| Proportion of women terminally ill with breast cancer who receive end-of-life care                                                                    | 9%     | 0%          | 91%    | Selected in round 1 |             |        | yes       |
| <b>Indicator #49 disaggregated (novel)</b>                                                                                                            |        |             |        |                     |             |        |           |
| Disaggregated by wealth quintile and ethnicity                                                                                                        | 9%     | 9%          | 82%    | Selected in round 1 |             |        | yes       |
| <b>Indicator #50 (novel)</b>                                                                                                                          |        |             |        |                     |             |        |           |
| Proportion of breast cancer survivors who receive survivorship care                                                                                   | 45%    | 0%          | 55%    | 50%                 | 13%         | 38%    | no        |
| <b>Indicator #50 disaggregated (novel)</b>                                                                                                            |        |             |        |                     |             |        |           |
| Disaggregated by wealth quintile and ethnicity                                                                                                        | 45%    | 9%          | 45%    | 50%                 | 13%         | 38%    | no        |
| <b>Indicator #51 (existing)</b>                                                                                                                       |        |             |        |                     |             |        |           |
| Self-reported satisfaction with breast surgery: breast conserving surgery and mastectomy                                                              | 36%    | 9%          | 55%    | 50%                 | 13%         | 38%    | no        |
| <b>Indicator #51 disaggregated (novel)</b>                                                                                                            |        |             |        |                     |             |        |           |

| Building blocks and indicators                                                                                                                                                                                                                                                               | ROUND1 |             |        | ROUND 2 |             |        | Selected? |
|----------------------------------------------------------------------------------------------------------------------------------------------------------------------------------------------------------------------------------------------------------------------------------------------|--------|-------------|--------|---------|-------------|--------|-----------|
|                                                                                                                                                                                                                                                                                              | Reject | Indifferent | Select | Reject  | Indifferent | Select |           |
| Disaggregated by wealth quintile and ethnicity                                                                                                                                                                                                                                               | 36%    | 18%         | 45%    | 50%     | 13%         | 38%    | no        |
| <b>Indicator #52 (novel)</b>                                                                                                                                                                                                                                                                 |        |             |        |         |             |        |           |
| Proportion of women who were offered breast reconstruction immediately after their mastectomy, excluding inflammatory breast cancer cases                                                                                                                                                    | 45%    | 9%          | 45%    | 50%     | 13%         | 38%    | no        |
| <b>Indicator #52 disaggregated (novel)</b>                                                                                                                                                                                                                                                   |        |             |        |         |             |        |           |
| Disaggregated by wealth quintile and ethnicity                                                                                                                                                                                                                                               | 45%    | 9%          | 45%    | 50%     | 0%          | 50%    | no        |
| <b>Indicator #53 (novel)</b>                                                                                                                                                                                                                                                                 |        |             |        |         |             |        |           |
| Self-reported satisfaction of breast cancer patients with their diagnosis journey: mammogram, ultrasound and breast biopsies                                                                                                                                                                 | 45%    | 0%          | 55%    | 38%     | 0%          | 63%    | no        |
| <b>Indicator #53 disaggregated (novel)</b>                                                                                                                                                                                                                                                   |        |             |        |         |             |        |           |
| Disaggregated by wealth quintile and ethnicity                                                                                                                                                                                                                                               | 45%    | 9%          | 45%    | 43%     | 14%         | 43%    | no        |
| <b>Indicator #54 (novel)</b>                                                                                                                                                                                                                                                                 |        |             |        |         |             |        |           |
| Self-reported satisfaction of breast cancer patients with their treatment                                                                                                                                                                                                                    | 55%    | 9%          | 36%    | 78%     | 11%         | 11%    | no        |
| <b>Indicator #54 disaggregated (novel)</b>                                                                                                                                                                                                                                                   |        |             |        |         |             |        |           |
| Disaggregated by wealth quintile and ethnicity                                                                                                                                                                                                                                               | 45%    | 9%          | 45%    | 75%     | 0%          | 25%    | no        |
| <b>Indicator #55 (novel)</b>                                                                                                                                                                                                                                                                 |        |             |        |         |             |        |           |
| Self-reported satisfaction of breast cancer patients with the palliative/supportive care received throughout their cancer journey                                                                                                                                                            | 27%    | 0%          | 73%    | 13%     | 13%         | 75%    | no        |
| <b>Indicator #55 disaggregated (novel)</b>                                                                                                                                                                                                                                                   |        |             |        |         |             |        |           |
| Disaggregated by wealth quintile and ethnicity                                                                                                                                                                                                                                               | 27%    | 9%          | 64%    | 13%     | 25%         | 63%    | no        |
| <b>Indicator #56 (novel)</b>                                                                                                                                                                                                                                                                 |        |             |        |         |             |        |           |
| Proportion of breast cancer patients who were followed by one or more of the following during their treatment: a psychologist, a social worker, a dietitian, an exercise physiologist, a genetic counsellor, an occupational therapist, a physiotherapist, and a specialist palliative care. | 45%    | 0%          | 55%    | 44%     | 22%         | 33%    | no        |
| <b>Indicator #56 disaggregated (novel)</b>                                                                                                                                                                                                                                                   |        |             |        |         |             |        |           |

| Building blocks and indicators                                                                                                                                                                            | ROUND1 |             |        | ROUND 2 |             |        | Selected? |
|-----------------------------------------------------------------------------------------------------------------------------------------------------------------------------------------------------------|--------|-------------|--------|---------|-------------|--------|-----------|
|                                                                                                                                                                                                           | Reject | Indifferent | Select | Reject  | Indifferent | Select |           |
| Disaggregated by wealth quintile and ethnicity                                                                                                                                                            | 45%    | 9%          | 45%    | 50%     | 13%         | 38%    | no        |
| <b>Indicator #57 (novel)</b>                                                                                                                                                                              |        |             |        |         |             |        |           |
| Proportion of breast cancer patients who received integrative therapies to help manage stress, anxiety and depression such as music therapy, meditation, stress management, yoga, relaxation, and massage | 36%    | 9%          | 55%    | 44%     | 11%         | 44%    | no        |
| <b>Indicator #57 disaggregated (novel)</b>                                                                                                                                                                |        |             |        |         |             |        |           |
| Disaggregated by wealth quintile and ethnicity                                                                                                                                                            | 50%    | 10%         | 40%    | 50%     | 13%         | 38%    | no        |
| <b>Indicator #58 (novel)</b>                                                                                                                                                                              |        |             |        |         |             |        |           |
| Proportion of breast cancer patients who received integrative therapies to help reduce chemotherapy-induced nausea and vomiting such as acupuncture and acupressure                                       | 36%    | 9%          | 55%    | 56%     | 22%         | 22%    | no        |
| <b>Indicator #58 disaggregated (novel)</b>                                                                                                                                                                |        |             |        |         |             |        |           |
| Disaggregated by wealth quintile and ethnicity                                                                                                                                                            | 40%    | 0%          | 60%    | 63%     | 13%         | 25%    | no        |
| <b>2. Health financing</b>                                                                                                                                                                                |        |             |        |         |             |        |           |
| Structural                                                                                                                                                                                                |        |             |        |         |             |        |           |
| <b>Indicator #59 (novel)</b>                                                                                                                                                                              |        |             |        |         |             |        |           |
| The NCP or NCDP addresses costs of implementation of the breast cancer strategy                                                                                                                           | 25%    | 0%          | 75%    | 10%     | 10%         | 80%    | yes       |
| <b>Indicator #60 (existing)</b>                                                                                                                                                                           |        |             |        |         |             |        |           |
| Total government health expenditure per capita                                                                                                                                                            | 42%    | 8%          | 50%    | 60%     | 10%         | 30%    | no        |
| <b>Indicator #61 (existing)</b>                                                                                                                                                                           |        |             |        |         |             |        |           |
| Share of government spending and out-of-pocket payment out of the total spending on health per capita                                                                                                     | 25%    | 0%          | 75%    | 10%     | 0%          | 90%    | yes       |
| <b>Indicator #62 (novel)</b>                                                                                                                                                                              |        |             |        |         |             |        |           |
| Total government spending on health compared with military as a percentage of GDP                                                                                                                         | 25%    | 8%          | 67%    | 50%     | 20%         | 30%    | no        |
| <b>Indicator #63 (existing)</b>                                                                                                                                                                           |        |             |        |         |             |        |           |

| Building blocks and indicators                                                                                                  | ROUND1 |             |        | ROUND 2             |             |        | Selected? |
|---------------------------------------------------------------------------------------------------------------------------------|--------|-------------|--------|---------------------|-------------|--------|-----------|
|                                                                                                                                 | Reject | Indifferent | Select | Reject              | Indifferent | Select |           |
| Proportion of total health expenditure dedicated to cancer                                                                      | 33%    | 8%          | 58%    | 30%                 | 30%         | 40%    | no        |
| <b>Indicator #64 (existing)</b>                                                                                                 |        |             |        |                     |             |        |           |
| The state has a <u>social health insurance system</u>                                                                           | 8%     | 8%          | 83%    | Selected in round 1 |             |        | yes       |
| Process                                                                                                                         |        |             |        |                     |             |        |           |
| <b>Indicator #65 (novel)</b>                                                                                                    |        |             |        |                     |             |        |           |
| The <u>social health insurance system</u> covers diagnostic services for breast cancer (i.e., biopsy, mammogram and ultrasound) | 18%    | 9%          | 73%    | 20%                 | 0%          | 80%    | yes       |
| <b>Indicator #66 (novel)</b>                                                                                                    |        |             |        |                     |             |        |           |
| The <u>social health insurance system</u> covers breast cancer treatment (i.e., hormone therapy and chemotherapy)               | 10%    | 10%         | 80%    | Selected in round 1 |             |        | yes       |
| <b>Indicator #67 (novel)</b>                                                                                                    |        |             |        |                     |             |        |           |
| The <u>social health insurance system</u> covers radiotherapy for breast cancer                                                 | 10%    | 10%         | 80%    | Selected in round 1 |             |        | yes       |
| <b>Indicator #68 (novel)</b>                                                                                                    |        |             |        |                     |             |        |           |
| The <u>social health insurance system</u> covers palliative care for breast cancer                                              | 10%    | 10%         | 80%    | Selected in round 1 |             |        | yes       |
| Outcome                                                                                                                         |        |             |        |                     |             |        |           |
| <b>Indicator #69 (novel)</b>                                                                                                    |        |             |        |                     |             |        |           |
| Proportion of breast cancer patients who benefit from the <u>social health insurance system</u>                                 | 17%    | 8%          | 75%    | 10%                 | 20%         | 70%    | no        |
| <b>Indicator #69 disaggregated (novel)</b>                                                                                      |        |             |        |                     |             |        |           |
| Disaggregated by wealth quintile, ethnicity <u>and migration status</u>                                                         | 25%    | 0%          | 75%    | 20%                 | 0%          | 80%    | yes       |
| <b>Indicator #70 (novel)</b>                                                                                                    |        |             |        |                     |             |        |           |
| Proportion of costs covered for breast cancer care by the <u>social health insurance system</u>                                 | 10%    | 10%         | 80%    | Selected in round 1 |             |        | yes       |
| <b>Indicator #71 (novel)</b>                                                                                                    |        |             |        |                     |             |        |           |
| Proportion of breast cancer patients with catastrophic health expenditure                                                       | 17%    | 17%         | 67%    | 20%                 | 20%         | 60%    | no        |
| <b>Indicator #71 disaggregated (novel)</b>                                                                                      |        |             |        |                     |             |        |           |

| Building blocks and indicators                                                                                                                                                        | ROUND1 |             |        | ROUND 2             |             |        | Selected? |
|---------------------------------------------------------------------------------------------------------------------------------------------------------------------------------------|--------|-------------|--------|---------------------|-------------|--------|-----------|
|                                                                                                                                                                                       | Reject | Indifferent | Select | Reject              | Indifferent | Select |           |
| Disaggregated by wealth quintile and ethnicity                                                                                                                                        | 25%    | 8%          | 67%    | 22%                 | 11%         | 67%    | no        |
| <b>3. Medicines</b>                                                                                                                                                                   |        |             |        |                     |             |        |           |
| Structural                                                                                                                                                                            |        |             |        |                     |             |        |           |
| <b>Indicator #72 (existing)</b>                                                                                                                                                       |        |             |        |                     |             |        |           |
| The Constitution, Bill of Rights or other statute recognises the right to access essential medicines                                                                                  | 15%    | 15%         | 69%    | 20%                 | 20%         | 60%    | no        |
| <b>Indicator #73 (existing)</b>                                                                                                                                                       |        |             |        |                     |             |        |           |
| There is an official national medicines policy to provide access to essential medicines                                                                                               | 15%    | 0%          | 85%    | Selected in round 1 |             |        | yes       |
| <b>Indicator #74 (novel)</b>                                                                                                                                                          |        |             |        |                     |             |        |           |
| The NCP or NCDP mentions breast cancer medicines included in the WHO Essential Medicines List                                                                                         | 15%    | 0%          | 85%    | Selected in round 1 |             |        | yes       |
| Process                                                                                                                                                                               |        |             |        |                     |             |        |           |
| <b>Indicator #75 (existing)</b>                                                                                                                                                       |        |             |        |                     |             |        |           |
| Coverage status of medicines for metastatic breast cancer <i>that are included in the WHO Essential Medicines List</i> : not approved, approved but not covered, approved and covered | 18%    | 18%         | 64%    | 33%                 | 0%          | 67%    | no        |
| <b>Indicator #76 (novel)</b>                                                                                                                                                          |        |             |        |                     |             |        |           |
| Proportion of breast cancer medicines <i>included in the WHO Essential Medicines List</i> that are available in the country and covered by public funding                             | 33%    | 25%         | 42%    | 10%                 | 10%         | 80%    | yes       |
| <b>Indicator #77 (novel)</b>                                                                                                                                                          |        |             |        |                     |             |        |           |
| Proportion of generics in the pharmaceutical market for breast cancer medicines                                                                                                       | 25%    | 8%          | 67%    | 20%                 | 10%         | 70%    | no        |
| Outcome                                                                                                                                                                               |        |             |        |                     |             |        |           |
| <b>Indicator #78 (novel)</b>                                                                                                                                                          |        |             |        |                     |             |        |           |
| Proportion of hospitals with breast cancer medicines shortage                                                                                                                         | 23%    | 15%         | 62%    | 20%                 | 30%         | 50%    | no        |
| <b>Indicator #78 disaggregated (novel)</b>                                                                                                                                            |        |             |        |                     |             |        |           |
| Disaggregated by geography                                                                                                                                                            | 31%    | 8%          | 62%    | 11%                 | 33%         | 56%    | no        |
| <b>Indicator #79 (novel)</b>                                                                                                                                                          |        |             |        |                     |             |        |           |
| Proportion of hospitals with palliative medicines shortage                                                                                                                            | 15%    | 8%          | 77%    | 10%                 | 10%         | 80%    | yes       |
| <b>Indicator #79 disaggregated (novel)</b>                                                                                                                                            |        |             |        |                     |             |        |           |

| Building blocks and indicators                                                                                                          | ROUND1 |             |        | ROUND 2             |             |        | Selected? |
|-----------------------------------------------------------------------------------------------------------------------------------------|--------|-------------|--------|---------------------|-------------|--------|-----------|
|                                                                                                                                         | Reject | Indifferent | Select | Reject              | Indifferent | Select |           |
| Disaggregated by geography                                                                                                              | 15%    | 8%          | 77%    | 0%                  | 11%         | 89%    | yes       |
| <b>4. Health workforce</b>                                                                                                              |        |             |        |                     |             |        |           |
| Structural                                                                                                                              |        |             |        |                     |             |        |           |
| <b>Indicator #80 (existing)</b>                                                                                                         |        |             |        |                     |             |        |           |
| The state has a national health workforce strategy                                                                                      | 23%    | 0%          | 77%    | 11%                 | 0%          | 89%    | yes       |
| <b>Indicator #81 (novel)</b>                                                                                                            |        |             |        |                     |             |        |           |
| The state law includes provision for adequate remuneration of doctors <i>and</i> nurses, <i>including</i> oncologists                   | 23%    | 8%          | 69%    | 30%                 | 10%         | 60%    | no        |
| <b>Indicator #82 (novel)</b>                                                                                                            |        |             |        |                     |             |        |           |
| The state's workforce policies or programmes provide incentives to promote stationing in rural areas of doctors, nurses and oncologists | 23%    | 0%          | 77%    | 20%                 | 10%         | 70%    | no        |
| <b>Indicator #83 (novel)</b>                                                                                                            |        |             |        |                     |             |        |           |
| Human rights are a compulsory part of the national curriculum for the training of doctors, nurses and oncologists                       | 38%    | 0%          | 62%    | 22%                 | 0%          | 78%    | no        |
| Process                                                                                                                                 |        |             |        |                     |             |        |           |
| <b>Indicator #84 (existing)</b>                                                                                                         |        |             |        |                     |             |        |           |
| Median time spent for a new consultation, as reported by oncologists                                                                    | 46%    | 0%          | 54%    | 40%                 | 20%         | 40%    | no        |
| <b>Indicator #85 (existing)</b>                                                                                                         |        |             |        |                     |             |        |           |
| Median job satisfaction score of oncologists                                                                                            | 58%    | 17%         | 25%    | 80%                 | 20%         | 0%     | no        |
| Outcome                                                                                                                                 |        |             |        |                     |             |        |           |
| <b>Indicator #86 (existing)</b>                                                                                                         |        |             |        |                     |             |        |           |
| Prevalence of certified oncologists per 1,000,000 population                                                                            | 15%    | 0%          | 85%    | Selected in round 1 |             |        | yes       |
| <b>Indicator #86 disaggregated (novel)</b>                                                                                              |        |             |        |                     |             |        |           |

| Building blocks and indicators                                                                                                                                                | ROUND1 |             |        | ROUND 2             |             |        | Selected? |
|-------------------------------------------------------------------------------------------------------------------------------------------------------------------------------|--------|-------------|--------|---------------------|-------------|--------|-----------|
|                                                                                                                                                                               | Reject | Indifferent | Select | Reject              | Indifferent | Select |           |
| Disaggregated by geography                                                                                                                                                    | 15%    | 0%          | 85%    | Selected in round 1 |             |        | yes       |
| <b>5. Health information</b>                                                                                                                                                  |        |             |        |                     |             |        |           |
| Structural                                                                                                                                                                    |        |             |        |                     |             |        |           |
| <b>Indicator #87 (novel)</b>                                                                                                                                                  |        |             |        |                     |             |        |           |
| The state law requires protection of the confidentiality of personal health data                                                                                              | 31%    | 0%          | 69%    | 11%                 | 11%         | 78%    | no        |
| <b>Indicator #88 (novel)</b>                                                                                                                                                  |        |             |        |                     |             |        |           |
| The state law allows for <i>controlled</i> exceptions to the restrictions of sharing personal health data for epidemiological research <i>by non-commercial organisations</i> | 31%    | 8%          | 62%    | 30%                 | 10%         | 60%    | no        |
| <b>Indicator #89 (novel)</b>                                                                                                                                                  |        |             |        |                     |             |        |           |
| The state law requires cancer registration                                                                                                                                    | 33%    | 0%          | 67%    | 33%                 | 0%          | 67%    | no        |
| <b>Indicator #90 (existing)</b>                                                                                                                                               |        |             |        |                     |             |        |           |
| The state law requires informed consent to treatment and other health interventions                                                                                           | 15%    | 0%          | 85%    | Selected in round 1 |             |        | yes       |
| <b>Indicator #91 (novel)</b>                                                                                                                                                  |        |             |        |                     |             |        |           |
| The NCP or NCDP <i>plans for</i> cancer research, <i>independent from pharmaceutical companies</i>                                                                            | 15%    | 15%         | 69%    | 20%                 | 20%         | 60%    | no        |
| <b>Indicator #92 (novel)</b>                                                                                                                                                  |        |             |        |                     |             |        |           |
| The NCP or NCDP protects the right to seek and receive health information                                                                                                     | 15%    | 0%          | 85%    | Selected in round 1 |             |        | yes       |
| <b>Indicator #93 (novel)</b>                                                                                                                                                  |        |             |        |                     |             |        |           |

| Building blocks and indicators                                                                                                                                                                | ROUND1 |             |        | ROUND 2             |             |        | Selected? |
|-----------------------------------------------------------------------------------------------------------------------------------------------------------------------------------------------|--------|-------------|--------|---------------------|-------------|--------|-----------|
|                                                                                                                                                                                               | Reject | Indifferent | Select | Reject              | Indifferent | Select |           |
| The NCP or NCDP addresses communication of information throughout the pathway of care for breast cancer, from screening through to referral, diagnosis, treatment options and palliative care | 15%    | 0%          | 85%    | Selected in round 1 |             |        | yes       |
| <b>Indicator #94 (novel)</b>                                                                                                                                                                  |        |             |        |                     |             |        |           |
| The NCP or NCDP addresses the needs of patients from culturally and linguistically diverse backgrounds                                                                                        | 15%    | 0%          | 85%    | Selected in round 1 |             |        | yes       |
| <b>Indicator #95 (novel)</b>                                                                                                                                                                  |        |             |        |                     |             |        |           |
| The NCP or NCDP addresses participation of patients in decisions that affect them                                                                                                             | 8%     | 0%          | 92%    | Selected in round 1 |             |        | yes       |
| <b>Indicator #96 (novel)</b>                                                                                                                                                                  |        |             |        |                     |             |        |           |
| The NCP or NCDP addresses awareness of breast self-examination                                                                                                                                | 31%    | 8%          | 62%    | 22%                 | 11%         | 67%    | no        |
| <b>Indicator #97 (novel)</b>                                                                                                                                                                  |        |             |        |                     |             |        |           |
| There is a charter of breast cancer patients' rights freely available and accessible to everyone                                                                                              | 38%    | 8%          | 54%    | 11%                 | 22%         | 67%    | no        |
| Process                                                                                                                                                                                       |        |             |        |                     |             |        |           |
| <b>Indicator #98 (novel)</b>                                                                                                                                                                  |        |             |        |                     |             |        |           |
| There is a national campaign to <i>raise awareness about</i> the screening programme                                                                                                          | 27%    | 18%         | 55%    | 33%                 | 0%          | 67%    | no        |
| <b>Indicator #99 (novel)</b>                                                                                                                                                                  |        |             |        |                     |             |        |           |
| The screening programme is implemented through community outreach activities                                                                                                                  | 50%    | 0%          | 50%    | 67%                 | 22%         | 11%    | no        |
| <b>Indicator #100 (novel)</b>                                                                                                                                                                 |        |             |        |                     |             |        |           |
| The screening programme includes information on the potential disadvantages and benefits of mammographic screening                                                                            | 25%    | 8%          | 67%    | 13%                 | 13%         | 75%    | no        |
| <b>Indicator #101 (novel)</b>                                                                                                                                                                 |        |             |        |                     |             |        |           |
| There is a national strategy to raise awareness on breast self-examination                                                                                                                    | 45%    | 9%          | 45%    | 67%                 | 11%         | 22%    | no        |



| Building blocks and indicators                                                                                                                                                                                                                                                       | ROUND1 |             |        | ROUND 2             |             |        | Selected? |
|--------------------------------------------------------------------------------------------------------------------------------------------------------------------------------------------------------------------------------------------------------------------------------------|--------|-------------|--------|---------------------|-------------|--------|-----------|
|                                                                                                                                                                                                                                                                                      | Reject | Indifferent | Select | Reject              | Indifferent | Select |           |
| <b>Indicator #102 (novel)</b><br>There is a national breast cancer patients association <i>independent from the pharmaceutical industry</i>                                                                                                                                          | 46%    | 15%         | 38%    | 20%                 | 10%         | 70%    | no        |
| <b>Indicator #103 (novel)</b><br>The personnel in the breast unit are trained to communicate information on diagnosis and treatment options, including side effects and survival, repeatedly, verbally and in writing, in a comprehensive and easily understandable form to patients | 15%    | 0%          | 85%    | Selected in round 1 |             |        | yes       |
| <b>Indicator #104 (novel)</b><br>The personnel in the breast unit presents all options available to the patient beside a mastectomy, and explains in an easily understandable way psychological distress that may be associated with a mastectomy                                    | 15%    | 0%          | 85%    | Selected in round 1 |             |        | yes       |
| <b>Indicator #105 (novel)</b><br>The personnel in the breast unit discusses breast reconstruction techniques individually taking into account anatomic, treatment- and patient-related factors and preferences                                                                       | 15%    | 0%          | 85%    | Selected in round 1 |             |        | yes       |
| <b>Indicator #106 (novel)</b><br>The breast unit website or other official source of information includes fertility issues and fertility-preservation techniques                                                                                                                     | 31%    | 15%         | 54%    | 50%                 | 20%         | 30%    | no        |
| <b>Indicator #107 (novel)</b><br>The breast cancer unit uses trained interpreters when communicating with patients from culturally and linguistically diverse background                                                                                                             | 15%    | 0%          | 85%    | Selected in round 1 |             |        | yes       |
| <b>Indicator #108 (novel)</b><br>The breast unit has a participatory process in place to include patients into decisions that affect them individually                                                                                                                               | 15%    | 0%          | 85%    | Selected in round 1 |             |        | yes       |
| <b>Indicator #109 (novel)</b><br>The breast unit directs patients to reliable, patient-centred websites                                                                                                                                                                              | 31%    | 8%          | 62%    | 30%                 | 30%         | 40%    | no        |
| <b>Indicator #110 (novel)</b><br>There is a state funded cancer registry                                                                                                                                                                                                             | 8%     | 25%         | 67%    | 0%                  | 22%         | 78%    | no        |
| <b>Indicator #111 (novel)</b>                                                                                                                                                                                                                                                        |        |             |        |                     |             |        |           |

| Building blocks and indicators                                                                                                                                                                                                                                                                                                                                                                                             | ROUND1 |             |        | ROUND 2             |             |        | Selected? |
|----------------------------------------------------------------------------------------------------------------------------------------------------------------------------------------------------------------------------------------------------------------------------------------------------------------------------------------------------------------------------------------------------------------------------|--------|-------------|--------|---------------------|-------------|--------|-----------|
|                                                                                                                                                                                                                                                                                                                                                                                                                            | Reject | Indifferent | Select | Reject              | Indifferent | Select |           |
| Number of treaty-based grounds of discrimination the cancer registry collects data on: sex; ethnic origin, race, or colour; age; disability; language; religion; national origin; socioeconomic status, social status, social origin, or birth; civil status; political status, or political or other opinion; and property; as well as non treaty-based grounds: people living in rural areas, sexual orientation, gender | 18%    | 18%         | 64%    | 40%                 | 20%         | 40%    | no        |
| Outcome                                                                                                                                                                                                                                                                                                                                                                                                                    |        |             |        |                     |             |        |           |
| <b>Indicator #112 (novel)</b>                                                                                                                                                                                                                                                                                                                                                                                              |        |             |        |                     |             |        |           |
| Proportion of women aged 50-69 who are aware of the importance of breast cancer screening                                                                                                                                                                                                                                                                                                                                  | 50%    | 0%          | 50%    | 38%                 | 38%         | 25%    | no        |
| <b>Indicator #112 disaggregated (novel)</b>                                                                                                                                                                                                                                                                                                                                                                                |        |             |        |                     |             |        |           |
| Disaggregated by wealth quintile and ethnicity                                                                                                                                                                                                                                                                                                                                                                             | 50%    | 8%          | 42%    | 43%                 | 29%         | 29%    | no        |
| <b>Indicator #113 (novel)</b>                                                                                                                                                                                                                                                                                                                                                                                              |        |             |        |                     |             |        |           |
| Proportion of women who had their mammography screening in the last <u>24 months</u> and were informed of the potential disadvantages and benefits of mammographic screening                                                                                                                                                                                                                                               | 42%    | 8%          | 50%    | 33%                 | 0%          | 67%    | no        |
| <b>Indicator #113 disaggregated (novel)</b>                                                                                                                                                                                                                                                                                                                                                                                |        |             |        |                     |             |        |           |
| Disaggregated by wealth quintile and ethnicity                                                                                                                                                                                                                                                                                                                                                                             | 42%    | 8%          | 50%    | 25%                 | 0%          | 75%    | no        |
| <b>Indicator #114 (novel)</b>                                                                                                                                                                                                                                                                                                                                                                                              |        |             |        |                     |             |        |           |
| Proportion of breast cancer patients who feel they have received sufficient, comprehensive and easily understandable information, including on treatment side effects and survival, to be involved in decisions about their care                                                                                                                                                                                           | 15%    | 8%          | 77%    | 10%                 | 0%          | 90%    | yes       |
| <b>Indicator #114 disaggregated (novel)</b>                                                                                                                                                                                                                                                                                                                                                                                |        |             |        |                     |             |        |           |
| Disaggregated by wealth quintile, ethnicity, <u>and language</u>                                                                                                                                                                                                                                                                                                                                                           | 15%    | 8%          | 77%    | 11%                 | 0%          | 89%    | yes       |
| <b>Indicator #115 (novel)</b>                                                                                                                                                                                                                                                                                                                                                                                              |        |             |        |                     |             |        |           |
| Proportion of women from culturally or linguistically diverse backgrounds who were offered an interpreter to communicate during their breast cancer journey                                                                                                                                                                                                                                                                | 23%    | 8%          | 69%    | 22%                 | 0%          | 78%    | no        |
| <b>Indicator #115 disaggregated (novel)</b>                                                                                                                                                                                                                                                                                                                                                                                |        |             |        |                     |             |        |           |
| Disaggregated by wealth quintile and ethnicity                                                                                                                                                                                                                                                                                                                                                                             | 25%    | 0%          | 75%    | 25%                 | 0%          | 75%    | no        |
| <b>Indicator #116 (novel)</b>                                                                                                                                                                                                                                                                                                                                                                                              |        |             |        |                     |             |        |           |
| Proportion of breast cancer patients who feel they have been involved in decisions about their care                                                                                                                                                                                                                                                                                                                        | 15%    | 0%          | 85%    | Selected in round 1 |             |        | yes       |
| <b>Indicator #116 disaggregated (novel)</b>                                                                                                                                                                                                                                                                                                                                                                                |        |             |        |                     |             |        |           |

| Building blocks and indicators                                                                                                                                                                                        | ROUND1 |             |        | ROUND 2 |             |        | Selected? |
|-----------------------------------------------------------------------------------------------------------------------------------------------------------------------------------------------------------------------|--------|-------------|--------|---------|-------------|--------|-----------|
|                                                                                                                                                                                                                       | Reject | Indifferent | Select | Reject  | Indifferent | Select |           |
| Disaggregated by wealth quintile and ethnicity                                                                                                                                                                        | 15%    | 8%          | 77%    | 22%     | 11%         | 67%    | no        |
| <b>Indicator #117 (novel)</b>                                                                                                                                                                                         |        |             |        |         |             |        |           |
| Proportion of breast cancer patients who feel they have received sufficient, comprehensive and easily understandable information about their mastectomy                                                               | 15%    | 8%          | 77%    | 22%     | 0%          | 78%    | no        |
| <b>Indicator #117 disaggregated (novel)</b>                                                                                                                                                                           |        |             |        |         |             |        |           |
| Disaggregated by wealth quintile and ethnicity                                                                                                                                                                        | 15%    | 8%          | 77%    | 22%     | 0%          | 78%    | no        |
| <b>Indicator #118 (novel)</b>                                                                                                                                                                                         |        |             |        |         |             |        |           |
| Proportion of breast cancer patients who feel they have been involved in making the decision to undergo a mastectomy                                                                                                  | 23%    | 0%          | 77%    | 22%     | 0%          | 78%    | no        |
| <b>Indicator #118 disaggregated (novel)</b>                                                                                                                                                                           |        |             |        |         |             |        |           |
| Disaggregated by wealth quintile and ethnicity                                                                                                                                                                        | 23%    | 8%          | 69%    | 22%     | 0%          | 78%    | no        |
| <b>Indicator #119 (novel)</b>                                                                                                                                                                                         |        |             |        |         |             |        |           |
| Proportion of premenopausal patients who received sufficient, comprehensive and easily understandable information about fertility issues and fertility-preservation techniques before receiving their treatment       | 23%    | 8%          | 69%    | 0%      | 33%         | 67%    | no        |
| <b>Indicator #119 disaggregated (novel)</b>                                                                                                                                                                           |        |             |        |         |             |        |           |
| Disaggregated by wealth quintile and ethnicity                                                                                                                                                                        | 23%    | 8%          | 69%    | 11%     | 22%         | 67%    | no        |
| <b>Indicator #120 (novel)</b>                                                                                                                                                                                         |        |             |        |         |             |        |           |
| Proportion of women with breast cancer who felt that they received sufficient information at all stages of their cancer journey, from screening through to referral, diagnosis, treatment options and palliative care | 23%    | 8%          | 69%    | 30%     | 10%         | 60%    | no        |
| <b>Indicator #120 disaggregated (novel)</b>                                                                                                                                                                           |        |             |        |         |             |        |           |
| Disaggregated by wealth quintile and ethnicity                                                                                                                                                                        | 23%    | 8%          | 69%    | 33%     | 11%         | 56%    | no        |
| <b>Indicator #121 (novel)</b>                                                                                                                                                                                         |        |             |        |         |             |        |           |

| Building blocks and indicators                                                                                                                   | ROUND1 |             |        | ROUND 2 |             |        | Selected? |
|--------------------------------------------------------------------------------------------------------------------------------------------------|--------|-------------|--------|---------|-------------|--------|-----------|
|                                                                                                                                                  | Reject | Indifferent | Select | Reject  | Indifferent | Select |           |
| Proportion of women who are aware of the importance of breast self-examination                                                                   | 42%    | 0%          | 58%    | 38%     | 13%         | 50%    | no        |
| <b>Indicator #121 disaggregated (novel)</b>                                                                                                      |        |             |        |         |             |        |           |
| Disaggregated by wealth quintile and ethnicity                                                                                                   | 42%    | 8%          | 50%    | 38%     | 0%          | 63%    | no        |
| <b>Indicator #122 (novel)</b>                                                                                                                    |        |             |        |         |             |        |           |
| Proportion of women regularly undertaking breast self-examination                                                                                | 42%    | 8%          | 50%    | 38%     | 25%         | 38%    | no        |
| <b>Indicator #122 disaggregated (novel)</b>                                                                                                      |        |             |        |         |             |        |           |
| Disaggregated by wealth quintile and ethnicity                                                                                                   | 42%    | 8%          | 50%    | 38%     | 13%         | 50%    | no        |
| <b>Indicator #123 (novel)</b>                                                                                                                    |        |             |        |         |             |        |           |
| Self-reported reason for women diagnosed with locally advanced or advanced breast cancer for not seeking care at an earlier stage of the disease | 42%    | 8%          | 50%    | 13%     | 38%         | 50%    | no        |
| <b>Indicator #123 disaggregated (novel)</b>                                                                                                      |        |             |        |         |             |        |           |
| Disaggregated by wealth quintile and ethnicity                                                                                                   | 42%    | 8%          | 50%    | 25%     | 25%         | 50%    | no        |
| <b>6. Governance / Leadership</b>                                                                                                                |        |             |        |         |             |        |           |
| Structural                                                                                                                                       |        |             |        |         |             |        |           |
| <b>Indicator #124 (existing)</b>                                                                                                                 |        |             |        |         |             |        |           |
| The Constitution, Bill of Rights, or other statute recognises the right to health                                                                | 17%    | 8%          | 75%    | 20%     | 0%          | 80%    | yes       |
| <b>Indicator #125 (novel)</b>                                                                                                                    |        |             |        |         |             |        |           |
| The state has transparent rules on lobbying, including a public lobbying register                                                                | 31%    | 15%         | 54%    | 11%     | 33%         | 56%    | no        |
| <b>Indicator #126 (novel)</b>                                                                                                                    |        |             |        |         |             |        |           |

| Building blocks and indicators                                                                               | ROUND1 |             |        | ROUND 2             |             |        | Selected? |
|--------------------------------------------------------------------------------------------------------------|--------|-------------|--------|---------------------|-------------|--------|-----------|
|                                                                                                              | Reject | Indifferent | Select | Reject              | Indifferent | Select |           |
| The state has an NCP or NCDP addressing breast cancer specifically                                           | 31%    | 15%         | 54%    | 30%                 | 20%         | 50%    | no        |
| <b>Indicator #127 (novel)</b>                                                                                |        |             |        |                     |             |        |           |
| The NCP or NCDP addresses accountability of the state and health institutions                                | 8%     | 15%         | 77%    | 0%                  | 20%         | 80%    | yes       |
| <b>Indicator #128 (novel)</b>                                                                                |        |             |        |                     |             |        |           |
| The NCP or NCDP addresses vulnerable populations such as ethnic minorities, refugees, homosexuals, and LBGQ+ | 17%    | 8%          | 75%    | 22%                 | 11%         | 67%    | no        |
| <b>Indicator #129 (novel)</b>                                                                                |        |             |        |                     |             |        |           |
| The NCP or NCDP explicitly recognises the right to health                                                    | 33%    | 8%          | 58%    | 40%                 | 10%         | 50%    | no        |
| <b>Indicator #130 (novel)</b>                                                                                |        |             |        |                     |             |        |           |
| The NCP or NCDP includes a protection against discrimination                                                 | 23%    | 0%          | 77%    | 11%                 | 0%          | 89%    | yes       |
| <b>Indicator #131 (novel)</b>                                                                                |        |             |        |                     |             |        |           |
| The NCP or NCDP includes an explicit commitment to universal access to cancer services and treatment         | 15%    | 0%          | 85%    | Selected in round 1 |             |        | yes       |
| <b>Indicator #132 (novel)</b>                                                                                |        |             |        |                     |             |        |           |
| The NCP or NCDP includes a set of targets and progress indicators <i>specific to breast cancer</i>           | 23%    | 0%          | 77%    | 10%                 | 0%          | 90%    | yes       |
| <b>Indicator #133 (novel)</b>                                                                                |        |             |        |                     |             |        |           |

| Building blocks and indicators                                                                                | ROUND1 |             |        | ROUND 2 |             |        | Selected? |
|---------------------------------------------------------------------------------------------------------------|--------|-------------|--------|---------|-------------|--------|-----------|
|                                                                                                               | Reject | Indifferent | Select | Reject  | Indifferent | Select |           |
| The state undertook a health impact assessment before adopting the national cancer plan                       | 23%    | 0%          | 77%    | 20%     | 10%         | 70%    | no        |
| <b>Indicator #134 (novel)</b>                                                                                 |        |             |        |         |             |        |           |
| The health impact assessment explicitly included the right to health                                          | 25%    | 8%          | 67%    | 30%     | 0%          | 70%    | no        |
| <b>Indicator #135 (novel)</b>                                                                                 |        |             |        |         |             |        |           |
| The NCP or NCDP includes a requirement for the participation of marginalised groups                           | 23%    | 0%          | 77%    | 22%     | 0%          | 78%    | no        |
| <b>Indicator #136 (novel)</b>                                                                                 |        |             |        |         |             |        |           |
| The Ministry of Health collaborates with the Ministries of Employment, Education, or Finance on cancer policy | 25%    | 8%          | 67%    | 30%     | 30%         | 40%    | no        |
| Process                                                                                                       |        |             |        |         |             |        |           |
| <b>No indicator</b>                                                                                           |        |             |        |         |             |        |           |
| Outcome                                                                                                       |        |             |        |         |             |        |           |
| <b>Indicator #137 (existing)</b>                                                                              |        |             |        |         |             |        |           |
| State's corruption index                                                                                      | 50%    | 0%          | 50%    | 40%     | 10%         | 50%    | no        |
| <b>Indicator #138 (existing)</b>                                                                              |        |             |        |         |             |        |           |
| State's rule of law index                                                                                     | 64%    | 0%          | 36%    | 50%     | 20%         | 30%    | no        |
| <b>7. Underlying determinants of breast cancer</b>                                                            |        |             |        |         |             |        |           |
| Structural                                                                                                    |        |             |        |         |             |        |           |
| <b>Indicator #139 (novel)</b>                                                                                 |        |             |        |         |             |        |           |

| Building blocks and indicators                                                                                                                                                                                   | ROUND1 |             |        | ROUND 2 |             |        | Selected? |
|------------------------------------------------------------------------------------------------------------------------------------------------------------------------------------------------------------------|--------|-------------|--------|---------|-------------|--------|-----------|
|                                                                                                                                                                                                                  | Reject | Indifferent | Select | Reject  | Indifferent | Select |           |
| The state is a party to the Framework Convention on Tobacco Control                                                                                                                                              | 42%    | 0%          | 58%    | 25%     | 13%         | 63%    | no        |
| <b>Indicator #140 (existing)</b>                                                                                                                                                                                 |        |             |        |         |             |        |           |
| The state has an operational policy, strategy or action plan to reduce the burden of tobacco use                                                                                                                 | 33%    | 0%          | 67%    | 13%     | 13%         | 75%    | no        |
| <b>Indicator #141 (existing)</b>                                                                                                                                                                                 |        |             |        |         |             |        |           |
| The state has an operational policy, strategy or action plan to reduce overweight and obesity                                                                                                                    | 33%    | 0%          | 67%    | 25%     | 13%         | 63%    | no        |
| <b>Indicator #142 (existing)</b>                                                                                                                                                                                 |        |             |        |         |             |        |           |
| The state has an operational policy, strategy or action plan to reduce physical inactivity and/or promote physical activity                                                                                      | 33%    | 0%          | 67%    | 25%     | 13%         | 63%    | no        |
| <b>Indicator #143 (existing)</b>                                                                                                                                                                                 |        |             |        |         |             |        |           |
| The state has an operational policy, strategy or action plan to reduce the harmful use of alcohol                                                                                                                | 33%    | 0%          | 67%    | 29%     | 14%         | 57%    | no        |
| Process                                                                                                                                                                                                          |        |             |        |         |             |        |           |
| <b>No indicator</b>                                                                                                                                                                                              |        |             |        |         |             |        |           |
| Outcome                                                                                                                                                                                                          |        |             |        |         |             |        |           |
| <b>Indicator #144 (novel)</b>                                                                                                                                                                                    |        |             |        |         |             |        |           |
| The country air pollution is below the WHO recommended annual mean (10 µg/m <sup>3</sup> for fine particulate matter PM <sub>2.5</sub> and 20 µg/m <sup>3</sup> for coarse particulate matter PM <sub>10</sub> ) | 33%    | 8%          | 58%    | 25%     | 25%         | 50%    | no        |
| <b>Indicator #145 (existing)</b>                                                                                                                                                                                 |        |             |        |         |             |        |           |
| Proportion of adult women who are smokers                                                                                                                                                                        | 33%    | 8%          | 58%    | 33%     | 22%         | 44%    | no        |
| <b>Indicator #146 (existing)</b>                                                                                                                                                                                 |        |             |        |         |             |        |           |
| Proportion of adult women who are overweight and obese                                                                                                                                                           | 36%    | 9%          | 55%    | 33%     | 22%         | 44%    | no        |
| <b>Indicator #147 (existing)</b>                                                                                                                                                                                 |        |             |        |         |             |        |           |

| Building blocks and indicators                                                                                                    | ROUND1 |             |        | ROUND 2             |             |        | Selected? |
|-----------------------------------------------------------------------------------------------------------------------------------|--------|-------------|--------|---------------------|-------------|--------|-----------|
|                                                                                                                                   | Reject | Indifferent | Select | Reject              | Indifferent | Select |           |
| Prevalence of hazardous drinking among women                                                                                      | 33%    | 0%          | 67%    | 33%                 | 22%         | 44%    | no        |
| <b>8. Redress</b>                                                                                                                 |        |             |        |                     |             |        |           |
| Structural                                                                                                                        |        |             |        |                     |             |        |           |
| <b>Indicator #148 (existing)</b>                                                                                                  |        |             |        |                     |             |        |           |
| There is an accessible pre-judicial mechanism to lodge complaints alleging breach of obligations connected to the right to health | 17%    | 0%          | 83%    | Selected in round 1 |             |        | yes       |
| Process                                                                                                                           |        |             |        |                     |             |        |           |
| <b>Indicator #149 (novel)</b>                                                                                                     |        |             |        |                     |             |        |           |
| Number of court cases litigated on cancer in a given year                                                                         | 67%    | 17%         | 17%    | 90%                 | 0%          | 10%    | no        |
| <b>Indicator #150 (novel)</b>                                                                                                     |        |             |        |                     |             |        |           |
| Proportion of class actions among the cases litigated on cancer in a given year                                                   | 46%    | 15%         | 38%    | 80%                 | 10%         | 10%    | no        |
| <b>Indicator #151 (novel)</b>                                                                                                     |        |             |        |                     |             |        |           |
| The breast unit has a formal complaints mechanism for patients                                                                    | 8%     | 8%          | 85%    | Selected in round 1 |             |        | yes       |
| <b>Indicator #151 disaggregated (novel)</b>                                                                                       |        |             |        |                     |             |        |           |
| Disaggregated by geography                                                                                                        | 15%    | 8%          | 77%    | 50%                 | 0%          | 50%    | no        |
| Outcome                                                                                                                           |        |             |        |                     |             |        |           |
| <b>No indicator</b>                                                                                                               |        |             |        |                     |             |        |           |
| <b>ADDITIONAL INDICATORS SUGGESTED IN ROUND 1, FOR SELECTION IN ROUND 2</b>                                                       |        |             |        |                     |             |        |           |
| <b>Indicator #152 (novel) - to replace indicator #13</b>                                                                          |        |             |        |                     |             |        |           |



| Building blocks and indicators                                                   | ROUND1 |             |        | ROUND 2 |             |        | Selected? |
|----------------------------------------------------------------------------------|--------|-------------|--------|---------|-------------|--------|-----------|
|                                                                                  | Reject | Indifferent | Select | Reject  | Indifferent | Select |           |
| Proportion of the population at risk participating in the screening programme    | NA     |             |        | 14%     | 0%          | 86%    | yes       |
| <b>Indicator #153 (novel)</b>                                                    |        |             |        |         |             |        |           |
| Prevalence of certified nurses per 1,000,000 population                          | NA     |             |        | 13%     | 0%          | 88%    | yes       |
| <b>Indicator #154 (existing)</b>                                                 |        |             |        |         |             |        |           |
| The State has ratified key human rights treaties recognising the right to health | NA     |             |        | 13%     | 0%          | 88%    | yes       |

**End of document**

*Words in italic and underlined show reformulation as per the panel's suggestions.*
